# Supplementary material for: Optimizing the optical and biological properties of 6-(1H-benzimidazole)-2-naphthalenol as a fluorescent probe for the detection of thiophenols: a theoretical study
Source: Royal Society of Chemistry journal article supplement (doi:10.1039/d0ra04835f), 2020-01-01
Supplement: d0ra04835f1.pdf [file d0ra04835f1.pdf]

## Optimizing the optical and biological properties of 6-(1H-benzimidazole)-2-naphthalenol as fluorescent probe for the detection of thiophenols: a theoretical study

Przemysław Krawczyk<sup>1\*</sup>

<sup>1</sup>Nicolaus Copernicus University, Collegium Medicum, Faculty of Pharmacy, Department of Physical Chemistry, Kurpińskiego 5, 85-950 Bydgoszcz, Poland

\*Corresponding author: przemekk@cm.umk.pl; tel: +48 52 5853679

| <b>Table of Contents</b>                                                                                                  | <b>Page</b> |
|---------------------------------------------------------------------------------------------------------------------------|-------------|
| <b>Figure 1.</b> The result of the O-S bond scan                                                                          | 2           |
| <b>Table SI1.</b> The frontier orbital energies in selected solvents for BIN-T derivatives.<br>All values are given in eV | 3           |
| <b>Table SI2.</b> The frontier orbital energies in selected solvents for BIN derivatives. All values are given in eV      | 5           |
| <b>Table SI3.</b> CT parameters for the bright low-lying excited state                                                    | 6           |
| <b>Table SI4.</b> Free energies ( $\Delta G_{\text{solvs}}$ , kcal/mol) of solvation                                      | 7           |
| <b>Table SI5.</b> The vertical and cLR corrected excitation energies (in nm)                                              | 7           |
| <b>Table SI6.</b> Calculated values of dipole moments (in D) for the ground and CT excited state                          | 8           |
| <b>Table SI7.</b> The vertical de-excitation energies (in nm)                                                             | 8           |
| <b>Table SI8.</b> Nonlinear properties. Values are given in a.u.                                                          | 9           |
| <b>Table SI9.</b> Results of the two-photon absorption cross section calculation                                          | 9           |
| <b>Table SI10.</b> Binding free energies ( $\Delta G_b$ , kcal/mol) obtained during AutoDock simulations                  | 10          |
| <b>Table SI11.</b> Biological activities for BIN-T derivatives                                                            | 11          |
| <b>Table SI12.</b> Biological activities for BIN derivatives                                                              | 12          |

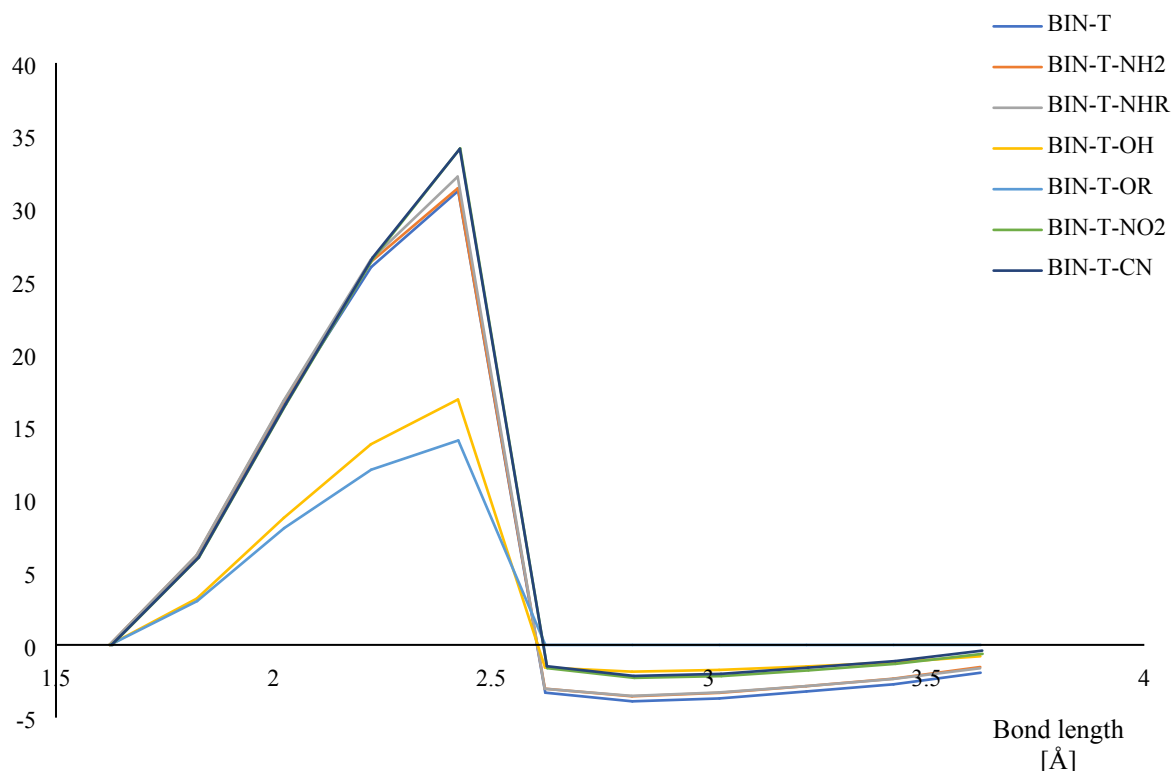

Figure 1. The result of the O-S bond scan

Table S11. The frontier orbital energies in selected solvents for BIN-T derivatives. All values are given in eV

| BIN-T                 | 1,4-Dx  | MeCN    | DMSO    | Water   |
|-----------------------|---------|---------|---------|---------|
| $E_{\text{HOMO}}$     | -6.2820 | -6.3536 | -6.3615 | -6.3645 |
| $E_{\text{LUMO}}$     | -3.6755 | -3.5664 | -3.5639 | -3.5612 |
| $E_{\text{GAP}}$      | 2.6065  | 2.7872  | 2.7976  | 2.8033  |
| $\eta$                | 1.3033  | 1.3936  | 1.3988  | 1.4016  |
| $\mu$                 | -4.9788 | -4.9600 | -4.9627 | -4.9629 |
| $\chi$                | 4.9788  | 4.9600  | 4.9627  | 4.9629  |
| BIN-T-NH <sub>2</sub> |         |         |         |         |
| $E_{\text{HOMO}}$     | -5.7081 | -5.7740 | -5.7761 | -5.7780 |
| $E_{\text{LUMO}}$     | -3.6554 | -3.5620 | -3.5598 | -3.5579 |
| $E_{\text{GAP}}$      | 2.0527  | 2.2119  | 2.2163  | 2.2201  |
| $\eta$                | 1.0264  | 1.1060  | 1.1081  | 1.1101  |
| $\mu$                 | -4.6817 | -4.6680 | -4.6680 | -4.6680 |
| $\chi$                | 4.6817  | 4.6680  | 4.6680  | 4.6680  |
| BIN-T-NHR             |         |         |         |         |
| $E_{\text{HOMO}}$     | -5.8050 | -5.8055 | -5.8083 | -5.8118 |
| $E_{\text{LUMO}}$     | -3.6388 | -3.5571 | -3.5555 | -3.5530 |
| $E_{\text{GAP}}$      | 2.1662  | 2.2484  | 2.2528  | 2.2587  |
| $\eta$                | 1.0831  | 1.1242  | 1.1264  | 1.1294  |
| $\mu$                 | -4.7219 | -4.6813 | -4.6819 | -4.6824 |
| $\chi$                | 4.7219  | 4.6813  | 4.6819  | 4.6824  |
| BIN-T-OH              |         |         |         |         |
| $E_{\text{HOMO}}$     | -6.0804 | -6.1449 | -6.1468 | -6.1498 |
| $E_{\text{LUMO}}$     | -3.6516 | -3.5656 | -3.5637 | -3.5609 |
| $E_{\text{GAP}}$      | 2.4288  | 2.5793  | 2.5831  | 2.5889  |
| $\eta$                | 1.2144  | 1.2897  | 1.2916  | 1.2944  |
| $\mu$                 | -4.8660 | -4.8552 | -4.8552 | -4.8554 |
| $\chi$                | 4.8660  | 4.8552  | 4.8552  | 4.8554  |
| BIN-T-OR              |         |         |         |         |
| $E_{\text{HOMO}}$     | -6.3612 | -6.4214 | -6.4236 | -6.4268 |
| $E_{\text{LUMO}}$     | -3.6788 | -3.5645 | -3.5620 | -3.5590 |
| $E_{\text{GAP}}$      | 2.6825  | 2.8569  | 2.8615  | 2.8678  |
| $\eta$                | 1.3412  | 1.4285  | 1.4308  | 1.4339  |
| $\mu$                 | -5.0200 | -4.9929 | -4.9928 | -4.9929 |
| $\chi$                | 5.0200  | 4.9929  | 4.9928  | 4.9929  |
| BIN-T-NO <sub>2</sub> |         |         |         |         |
| $E_{\text{HOMO}}$     | -6.6511 | -6.7098 | -6.7118 | -6.7145 |
| $E_{\text{LUMO}}$     | -3.7512 | -3.5881 | -3.5849 | -3.5805 |

|                   |         |         |         |         |
|-------------------|---------|---------|---------|---------|
| $E_{\text{GAP}}$  | 2.8999  | 3.1217  | 3.1269  | 3.1339  |
| $\eta$            | 1.4500  | 1.5609  | 1.5634  | 1.5670  |
| $\mu$             | -5.2011 | -5.1490 | -5.1483 | -5.1475 |
| $\chi$            | 5.2011  | 5.1490  | 5.1483  | 5.1475  |
| BIN-T-CN          |         |         |         |         |
| $E_{\text{HOMO}}$ | -6.6179 | -6.6832 | -6.6854 | -6.6883 |
| $E_{\text{LUMO}}$ | -3.7433 | -3.5846 | -3.5816 | -3.5767 |
| $E_{\text{GAP}}$  | 2.8746  | 3.0986  | 3.1037  | 3.1116  |
| $\eta$            | 1.4373  | 1.5493  | 1.5519  | 1.5558  |
| $\mu$             | -5.1806 | -5.1339 | -5.1335 | -5.1325 |
| $\chi$            | 5.1806  | 5.1339  | 5.1335  | 5.1325  |

---

Table SI2. The frontier orbital energies in selected solvents for BIN derivatives. All values are given in eV

| BIN                 | 1,4-Dx  | MeCN    | DMSO    | Water   |
|---------------------|---------|---------|---------|---------|
| $E_{\text{HOMO}}$   | -5.9506 | -6.0583 | -6.0608 | -6.0646 |
| $E_{\text{LUMO}}$   | -1.6062 | -1.6990 | -1.7014 | -1.7044 |
| $E_{\text{GAP}}$    | 4.3444  | 4.3594  | 4.3594  | 4.3602  |
| $\eta$              | 2.1722  | 2.1797  | 2.1797  | 2.1801  |
| $\mu$               | -3.7784 | -3.8787 | -3.8811 | -3.8845 |
| $\chi$              | 3.7784  | 3.8787  | 3.8811  | 3.8845  |
| BIN-NH <sub>2</sub> |         |         |         |         |
| $E_{\text{HOMO}}$   | -5.4882 | -5.6074 | -5.6104 | -5.6139 |
| $E_{\text{LUMO}}$   | -1.3395 | -1.4448 | -1.4472 | -1.4508 |
| $E_{\text{GAP}}$    | 4.1488  | 4.1626  | 4.1632  | 4.1632  |
| $\eta$              | 2.0744  | 2.0813  | 2.0816  | 2.0816  |
| $\mu$               | -3.4138 | -3.5261 | -3.5288 | -3.5324 |
| $\chi$              | 3.4138  | 3.5261  | 3.5288  | 3.5324  |
| BIN-NHR             |         |         |         |         |
| $E_{\text{HOMO}}$   | -5.5258 | -5.6545 | -5.6580 | -5.6545 |
| $E_{\text{LUMO}}$   | -1.2638 | -1.3512 | -1.3536 | -1.3512 |
| $E_{\text{GAP}}$    | 4.2620  | 4.3033  | 4.3044  | 4.3033  |
| $\eta$              | 2.1310  | 2.1517  | 2.1522  | 2.1517  |
| $\mu$               | -3.3948 | -3.5028 | -3.5058 | -3.5028 |
| $\chi$              | 3.3948  | 3.5028  | 3.5058  | 3.5028  |
| BIN-OH              |         |         |         |         |
| $E_{\text{HOMO}}$   | -5.9027 | -6.0118 | -6.0145 | -6.0183 |
| $E_{\text{LUMO}}$   | -1.5006 | -1.5485 | -1.5504 | -1.5528 |
| $E_{\text{GAP}}$    | 4.4021  | 4.4633  | 4.4642  | 4.4655  |
| $\eta$              | 2.2011  | 2.2317  | 2.2321  | 2.2328  |
| $\mu$               | -3.7016 | -3.7801 | -3.7825 | -3.7856 |
| $\chi$              | 3.7016  | 3.7801  | 3.7825  | 3.7856  |
| BIN-OR              |         |         |         |         |
| $E_{\text{HOMO}}$   | -5.9753 | -6.1052 | -6.1087 | -6.1136 |
| $E_{\text{LUMO}}$   | -1.5101 | -1.6119 | -1.6138 | -1.6162 |
| $E_{\text{GAP}}$    | 4.4652  | 4.4933  | 4.4949  | 4.4974  |
| $\eta$              | 2.2326  | 2.2466  | 2.2475  | 2.2487  |
| $\mu$               | -3.7427 | -3.8585 | -3.8612 | -3.8649 |
| $\chi$              | 3.7427  | 3.8585  | 3.8612  | 3.8649  |
| BIN-NO <sub>2</sub> |         |         |         |         |
| $E_{\text{HOMO}}$   | -6.3721 | -6.4383 | -6.4404 | -6.4431 |
| $E_{\text{LUMO}}$   | -2.3194 | -2.5543 | -2.5611 | -2.5706 |

|                   |         |         |         |         |
|-------------------|---------|---------|---------|---------|
| $E_{\text{GAP}}$  | 4.0527  | 3.8840  | 3.8793  | 3.8725  |
| $\eta$            | 2.0263  | 1.9420  | 1.9397  | 1.9363  |
| $\mu$             | -4.3458 | -4.4963 | -4.5008 | -4.5069 |
| $\chi$            | 4.3458  | 4.4963  | 4.5008  | 4.5069  |
| BIN-CN            |         |         |         |         |
| $E_{\text{HOMO}}$ | -6.3457 | -6.4140 | -6.4159 | -6.4184 |
| $E_{\text{LUMO}}$ | -2.3069 | -2.3752 | -2.3769 | -2.3793 |
| $E_{\text{GAP}}$  | 4.0388  | 4.0388  | 4.0391  | 4.0391  |
| $\eta$            | 2.0194  | 2.0194  | 2.0195  | 2.0195  |
| $\mu$             | -4.3263 | -4.3946 | -4.3964 | -4.3988 |
| $\chi$            | 4.3263  | 4.3946  | 4.3964  | 4.3988  |

Table SI3. CT parameters for the bright low-lying excited state

|                        | 1,4-Dx          |                 | MeCN            |                 | DMSO            |                 | Water           |                 |
|------------------------|-----------------|-----------------|-----------------|-----------------|-----------------|-----------------|-----------------|-----------------|
|                        | $q_{\text{CT}}$ | $D_{\text{CT}}$ | $q_{\text{CT}}$ | $D_{\text{CT}}$ | $q_{\text{CT}}$ | $D_{\text{CT}}$ | $q_{\text{CT}}$ | $D_{\text{CT}}$ |
| BIN                    | 0.426           | 1.682           | 0.404           | 0.956           | 0.403           | 0.880           | 0.403           | 0.920           |
| BIN-NH <sub>2</sub>    | 0.462           | 0.413           | 0.470           | 0.660           | 0.471           | 0.708           | 0.470           | 0.685           |
| BIN-NHR                | 0.578           | 2.136           | 0.556           | 1.968           | 0.554           | 1.945           | 0.555           | 1.950           |
| BIN-OH                 | 0.523           | 2.930           | 0.445           | 2.334           | 0.441           | 2.244           | 0.441           | 2.271           |
| BIN-OR                 | 0.384           | 1.088           | 0.382           | 0.770           | 0.382           | 0.716           | 0.382           | 0.734           |
| BIN-NO <sub>2</sub>    | 0.891           | 1.331           | 0.960           | 1.534           | 0.960           | 1.541           | 0.962           | 1.550           |
| BIN-CN                 | 0.559           | 2.008           | 0.544           | 1.208           | 0.544           | 1.187           | 0.544           | 1.150           |
| BIN-T                  | 1.351           | 7.503           | 1.305           | 8.164           | 1.305           | 8.151           | 1.304           | 8.157           |
| BIN-T -NH <sub>2</sub> | 1.371           | 6.857           | 1.318           | 7.550           | 1.317           | 7.558           | 1.316           | 7.578           |
| BIN-T -NHR             | 1.399           | 6.576           | 1.347           | 7.182           | 1.346           | 7.196           | 1.345           | 7.212           |
| BIN-T -OH              | 1.359           | 6.829           | 1.310           | 7.625           | 1.309           | 7.582           | 1.308           | 7.598           |
| BIN-T -OR              | 1.364           | 7.178           | 1.316           | 7.764           | 1.315           | 7.761           | 1.313           | 7.792           |
| BIN-T -NO <sub>2</sub> | 1.377           | 7.909           | 1.315           | 8.637           | 1.314           | 8.644           | 1.313           | 8.656           |
| BIN-T -CN              | 1.367           | 7.861           | 1.310           | 8.608           | 1.309           | 8.616           | 1.308           | 8.631           |

Table SI4. Free energies ( $\Delta G_{\text{solv}}$ , kcal/mol) of solvation

|                       | 1,4-Dx | MeCN   | DMSO   | Water  |
|-----------------------|--------|--------|--------|--------|
| BIN                   | -12.03 | -23.72 | -20.21 | -18.52 |
| BIN-NH <sub>2</sub>   | -12.01 | -24.52 | -21.10 | -18.92 |
| BIN-NHR               | -13.42 | -27.28 | -23.52 | -22.15 |
| BIN-OH                | -15.14 | -28.97 | -25.46 | -25.70 |
| BIN-OR                | -11.66 | -25.47 | -21.67 | -20.64 |
| BIN-NO <sub>2</sub>   | -14.68 | -27.95 | -24.51 | -21.54 |
| BIN-CN                | -13.65 | -28.23 | -24.50 | -22.48 |
| BIN-T                 | -17.62 | -29.06 | -26.48 | -20.37 |
| BIN-T-NH <sub>2</sub> | -17.70 | -30.59 | -28.75 | -23.30 |
| BIN-T-NHR             | -19.74 | -34.82 | -31.70 | -27.76 |
| BIN-T-OH              | -19.81 | -31.05 | -28.15 | -20.88 |
| BIN-T-OR              | -16.84 | -29.94 | -26.53 | -20.28 |
| BIN-T-NO <sub>2</sub> | -20.05 | -34.63 | -30.28 | -23.65 |
| BIN-T-CN              | -20.17 | -35.09 | -31.70 | -24.78 |

Table SI5. The vertical and cLR corrected excitation energies (in nm)

|                       | 1,4-Dx                                |        | MeCN                                |                                       | DMSO   |                                     | Water                                 |        |                                     |                                       |        |                                     |
|-----------------------|---------------------------------------|--------|-------------------------------------|---------------------------------------|--------|-------------------------------------|---------------------------------------|--------|-------------------------------------|---------------------------------------|--------|-------------------------------------|
|                       | $\lambda_{\text{ABS}}^{\text{TDDFT}}$ | $f$    | $\lambda_{\text{ABS}}^{\text{cLR}}$ | $\lambda_{\text{ABS}}^{\text{TDDFT}}$ | $f$    | $\lambda_{\text{ABS}}^{\text{cLR}}$ | $\lambda_{\text{ABS}}^{\text{TDDFT}}$ | $f$    | $\lambda_{\text{ABS}}^{\text{cLR}}$ | $\lambda_{\text{ABS}}^{\text{TDDFT}}$ | $f$    | $\lambda_{\text{ABS}}^{\text{cLR}}$ |
| BIN                   | 334.11                                | 0.5319 | 330.62                              | 331.81                                | 0.5849 | 327.97                              | 332.60                                | 0.6165 | 328.04                              | 331.63                                | 0.5831 | 327.86                              |
| BIN-NH <sub>2</sub>   | 355.99                                | 0.4503 | 350.81                              | 353.67                                | 0.5063 | 349.06                              | 354.62                                | 0.5316 | 349.22                              | 353.48                                | 0.5054 | 349.00                              |
| BIN-NHR               | 350.60                                | 0.0793 | 351.50                              | 345.56                                | 0.0888 | 346.19                              | 345.93                                | 0.0934 | 346.51                              | 345.21                                | 0.0889 | 345.81                              |
| BIN-OH                | 332.50                                | 0.1317 | 334.03                              | 325.59                                | 0.2252 | 324.65                              | 325.99                                | 0.2456 | 324.64                              | 325.28                                | 0.2304 | 324.25                              |
| BIN-OR                | 325.69                                | 0.3753 | 322.42                              | 323.16                                | 0.3648 | 320.33                              | 323.59                                | 0.3831 | 320.28                              | 323.01                                | 0.3645 | 320.23                              |
| BIN-NO <sub>2</sub>   | 386.47                                | 0.0972 | 400.71                              | 414.60                                | 0.0485 | 438.82                              | 415.52                                | 0.0503 | 443.64                              | 416.26                                | 0.0470 | 440.58                              |
| BIN-CN                | 365.28                                | 0.3927 | 364.84                              | 364.97                                | 0.3802 | 363.98                              | 365.73                                | 0.3941 | 364.50                              | 364.88                                | 0.3770 | 363.90                              |
| BIN-T                 | 428.75                                | 1.0002 | 422.29                              | 403.90                                | 1.0001 | 407.43                              | 403.17                                | 1.0001 | 408.65                              | 402.48                                | 1.0001 | 405.31                              |
| BIN-T-NH <sub>2</sub> | 453.15                                | 1.0015 | 406.48                              | 428.62                                | 1.0018 | 428.09                              | 428.00                                | 1.0019 | 426.97                              | 427.45                                | 1.0018 | 426.44                              |
| BIN-T-NHR             | 472.93                                | 1.0009 | 472.15                              | 435.34                                | 1.0011 | 476.89                              | 434.67                                | 1.0011 | 435.99                              | 433.73                                | 1.0011 | 435.31                              |
| BIN-T-OH              | 424.19                                | 1.0011 | 429.29                              | 407.45                                | 1.0013 | 407.92                              | 407.03                                | 1.0001 | 409.85                              | 406.42                                | 1.0013 | 409.95                              |
| BIN-T-OR              | 440.23                                | 1.0001 | 445.34                              | 413.14                                | 1.0000 | 414.86                              | 412.55                                | 1.0002 | 417.54                              | 411.87                                | 1.0000 | 416.81                              |
| BIN-T-NO <sub>2</sub> | 424.52                                | 1.0003 | 422.64                              | 393.58                                | 1.0001 | 429.33                              | 392.87                                | 1.0001 | 397.43                              | 392.40                                | 1.0698 | 390.72                              |
| BIN-T-CN              | 422.93                                | 1.0003 | 426.18                              | 394.37                                | 1.0003 | 425.82                              | 393.77                                | 1.0003 | 393.99                              | 392.88                                | 1.0003 | 394.25                              |

Table SI6. Calculated values of dipole moments (in D) for the ground and CT excited state

|                     | 1,4-Dx     |            | MeCN       |            | DMSO       |            | Water      |            |
|---------------------|------------|------------|------------|------------|------------|------------|------------|------------|
|                     | $\mu_{GS}$ | $\mu_{CT}$ | $\mu_{GS}$ | $\mu_{CT}$ | $\mu_{GS}$ | $\mu_{CT}$ | $\mu_{GS}$ | $\mu_{CT}$ |
| BIN                 | 2.67       | 8.67       | 3.39       | 7.47       | 3.41       | 7.06       | 3.43       | 7.49       |
| BIN-NH <sub>2</sub> | 1.58       | 2.89       | 1.90       | 4.04       | 1.91       | 4.21       | 1.92       | 4.08       |
| BIN-NHR             | 4.09       | 6.04       | 5.18       | 6.98       | 5.22       | 7.00       | 5.26       | 7.05       |
| BIN-OH              | 4.84       | 8.02       | 5.76       | 6.75       | 5.79       | 6.62       | 5.81       | 6.78       |
| BIN-OR              | 3.67       | 5.91       | 5.11       | 7.83       | 5.16       | 7.56       | 5.18       | 7.91       |
| BIN-NO <sub>2</sub> | 6.19       | 10.03      | 7.78       | 13.87      | 7.82       | 13.94      | 7.87       | 14.07      |
| BIN-CN              | 6.55       | 11.75      | 8.32       | 11.17      | 8.34       | 11.15      | 8.39       | 11.18      |
| BIN-T               | 1.32       | 4.90       | 2.16       | 5.13       | 1.81       | 5.11       | 1.83       | 5.11       |
| BIN-NH <sub>2</sub> | 2.51       | 4.64       | 2.77       | 4.84       | 2.79       | 5.17       | 2.38       | 5.22       |
| BIN-NHR             | 3.06       | 4.71       | 3.50       | 4.84       | 3.49       | 5.96       | 3.49       | 5.97       |
| BIN-OH              | 3.47       | 10.88      | 3.90       | 5.04       | 3.92       | 5.05       | 3.95       | 5.46       |
| BIN-OR              | 1.12       | 4.71       | 1.62       | 4.79       | 1.65       | 4.82       | 1.69       | 4.84       |
| BIN-NO <sub>2</sub> | 3.88       | 5.41       | 5.24       | 9.85       | 5.27       | 10.21      | 5.23       | 10.46      |
| BIN-CN              | 4.44       | 5.76       | 5.84       | 10.18      | 5.88       | 10.31      | 5.92       | 10.37      |

Table SI7. The vertical de-excitation energies (in nm)

|                       | 1,4-Dx | MeCN   | DMSO   | Water  |
|-----------------------|--------|--------|--------|--------|
| BIN                   | 459.88 | 460.64 | 462.41 | 460.31 |
| BIN-NH <sub>2</sub>   | 439.93 | 471.84 | 473.24 | 471.48 |
| BIN-NHR               | 439.59 | 436.88 | 437.86 | 436.62 |
| BIN-OH                | 471.62 | 462.85 | 464.71 | 462.75 |
| BIN-OR                | 464.7  | 462.94 | 464.64 | 462.65 |
| BIN-NO <sub>2</sub>   | 516.55 | 538.98 | 539.65 | 540.55 |
| BIN-CN                | 501.59 | 507.14 | 509.03 | 507.30 |
| BIN-T                 | 693.23 | 583.30 | 584.69 | 582.65 |
| BIN-T-NH <sub>2</sub> | 715.55 | 625.50 | 626.52 | 627.74 |
| BIN-T-NHR             | 730.02 | 629.82 | 627.44 | 623.63 |
| BIN-T-OH              | 665.85 | 863.21 | 857.92 | 520.00 |
| BIN-T-OR              | 730.62 | 612.24 | 610.00 | 607.05 |
| BIN-T-NO <sub>2</sub> | 696.19 | 609.17 | 607.50 | 606.48 |
| BIN-T-CN              | 668.50 | 516.33 | 524.55 | 525.50 |



Table SI8. Nonlinear properties. Values are given in a.u.

|                       | 1,4-Dx         |               | MeCN           |               | DMSO           |               | Water          |               |
|-----------------------|----------------|---------------|----------------|---------------|----------------|---------------|----------------|---------------|
|                       | $\Delta\alpha$ | $\beta_{vec}$ | $\Delta\alpha$ | $\beta_{vec}$ | $\Delta\alpha$ | $\beta_{vec}$ | $\Delta\alpha$ | $\beta_{vec}$ |
| BIN                   | 284.82         | 581.46        | 340.03         | 1140.92       | 341.31         | 1153.5        | 342.96         | 1169.43       |
| BIN-NH <sub>2</sub>   | 301.13         | 1365.42       | 361.43         | 2182.52       | 362.82         | 2200.17       | 364.64         | 2223.18       |
| BIN-NHR               | 301.96         | 492.60        | 360.57         | 786.91        | 361.93         | 792.37        | 363.73         | 899.39        |
| BIN-OH                | 282.72         | 266.42        | 337.23         | 979.07        | 338.50         | 997.04        | 340.17         | 1020.66       |
| BIN-OR                | 297.61         | 253.73        | 353.17         | 501.68        | 354.41         | 507.41        | 356.04         | 514.84        |
| BIN-NO <sub>2</sub>   | 296.82         | 255.92        | 356.02         | 58.87         | 357.38         | 71.34         | 359.18         | 88.14         |
| BIN-CN                | 300.59         | 140.96        | 360.62         | 226.14        | 362.00         | 239.55        | 363.82         | 257.54        |
| BIN-T                 | 515.28         | 42.44         | 515.28         | 21.65         | 513.95         | 47.09         | 517.69         | 7.07          |
| BIN-T-NH <sub>2</sub> | 455.37         | 1252.42       | 536.07         | 673.81        | 538.02         | 667.00        | 540.67         | 645.13        |
| BIN-T-NHR             | 454.13         | 807.11        | 534.42         | 686.67        | 536.42         | 690.26        | 539.01         | 694.93        |
| BIN-T-OH              | 444.10         | 1598.86       | 521.08         | 2034.87       | 522.92         | 2041.02       | 525.36         | 2049.36       |
| BIN-T-OR              | 445.89         | 1686.79       | 525.05         | 1703.11       | 526.99         | 1726.79       | 529.48         | 1760.67       |
| BIN-T-NO <sub>2</sub> | 449.52         | 1754.66       | 529.87         | 2121.35       | 531.81         | 2121.67       | 534.72         | 2184.23       |
| BIN-T-CN              | 410.21         | 1423.30       | 498.73         | 1461.47       | 500.53         | 1479.39       | 501.07         | 1496.24       |

Table SI9. Results of the two-photon absorption cross section calculation

|                       | 1,4-Dx                      |                 | MeCN                        |                 | DMSO                        |                 | Water                       |                 |
|-----------------------|-----------------------------|-----------------|-----------------------------|-----------------|-----------------------------|-----------------|-----------------------------|-----------------|
|                       | $\langle\delta^{OF}\rangle$ | $\sigma_{OF}^2$ | $\langle\delta^{OF}\rangle$ | $\sigma_{OF}^2$ | $\langle\delta^{OF}\rangle$ | $\sigma_{OF}^2$ | $\langle\delta^{OF}\rangle$ | $\sigma_{OF}^2$ |
| BIN                   | 29.07                       | 0.14            | 28.27                       | 0.14            | 27.83                       | 0.13            | 27.74                       | 0.13            |
| BIN-NH <sub>2</sub>   | 327.70                      | 1.39            | 337.78                      | 1.43            | 339.40                      | 1.44            | 339.40                      | 1.44            |
| BIN-NHR               | 357.12                      | 1.57            | 351.51                      | 1.56            | 351.51                      | 1.56            | 351.51                      | 1.56            |
| BIN-OH                | 27.78                       | 0.03            | 103.13                      | 0.49            | 103.13                      | 0.49            | 103.31                      | 0.49            |
| BIN-OR                | 68.98                       | 0.35            | 46.03                       | 0.23            | 45.73                       | 0.23            | 45.17                       | 0.23            |
| BIN-NO <sub>2</sub>   | 219.14                      | 0.92            | 215.55                      | 0.90            | 216.27                      | 0.90            | 217.52                      | 0.91            |
| BIN-CN                | 424.68                      | 1.81            | 442.17                      | 1.87            | 442.17                      | 1.87            | 442.17                      | 1.877           |
| BIN-T                 | 3130.15                     | 11.68           | 3629.59                     | 13.25           | 3607.64                     | 13.17           | 3608.61                     | 13.17           |
| BIN-T-NH <sub>2</sub> | 2606.99                     | 7.01            | 2766.81                     | 7.24            | 2763.50                     | 7.24            | 2872.63                     | 7.47            |
| BIN-T-NHR             | 1780.08                     | 4.88            | 1783.85                     | 4.89            | 1791.41                     | 4.91            | 1806.53                     | 4.95            |
| BIN-T-OH              | 1988.34                     | 6.61            | 2202.27                     | 7.15            | 2200.92                     | 7.15            | 2197.89                     | 7.14            |
| BIN-T-OR              | 2035.53                     | 7.90            | 2545.60                     | 9.55            | 2568.09                     | 9.64            | 2599.40                     | 9.76            |
| BIN-T-NO <sub>2</sub> | 1914.70                     | 8.31            | 2398.60                     | 10.25           | 2397.50                     | 10.25           | 2403.32                     | 10.27           |
| BIN-T-CN              | 5524.42                     | 24.11           | 5836.48                     | 25.20           | 5826.43                     | 25.16           | 5864.79                     | 25.33           |

Table SI10. Binding free energies ( $\Delta G_b$ , kcal/mol) obtained during AutoDock simulations

| CYS | BIN-T | BIN-T-NH2 | BIN-T-NHR | BIN-T-OH | BIN-T-OR | BIN-T-NO2 | BIN-T-CN |
|-----|-------|-----------|-----------|----------|----------|-----------|----------|
| 34  | -4.9  | -5.4      | -3.6      | -5.5     | -3.9     | -3.9      | -5.5     |
| 53  | -5.6  | -5.5      | -4.2      | -5.5     | -4.8     | -4.8      | -5.3     |
| 62  | -5.3  | -4.7      | -4.8      | -5.6     | -4.1     | -4.1      | -4.6     |
| 75  | -6.3  | -6.6      | -6.6      | -6.2     | -6.4     | -6.4      | -6.8     |
| 90  | -4.2  | -4.0      | -3.3      | -4.0     | -3.3     | -3.3      | -4.2     |
| 91  | -5.2  | -6.1      | -5.9      | -6.1     | -5.4     | -5.4      | -6.3     |
| 101 | -5.5  | -7.5      | -6.9      | -5.8     | -6.7     | -6.7      | -8.1     |
| 124 | -6.0  | -6.2      | -5.3      | -5.7     | -5.4     | -5.4      | -6.6     |
| 168 | -5.1  | -5.2      | -5.1      | -5.0     | -5.2     | -5.2      | -5.6     |
| 169 | -4.8  | -5.0      | -4.1      | -4.7     | -4.6     | -4.6      | -4.3     |
| 177 | -5.4  | -5.1      | -5.4      | -5.2     | -5.4     | -5.4      | -5.6     |
| 200 | -6.0  | -6.6      | -6.7      | -4.6     | -5.2     | -5.2      | -6.9     |
| 245 | -5.1  | -2.5      | -1.2      | -1.8     | -1.4     | -1.4      | -3.6     |
| 246 | -5.3  | -6.6      | -7.2      | -7.1     | -7.5     | -7.5      | -6.8     |
| 253 | -2.6  | -2.3      | -1.7      | -4.6     | -0.9     | -0.9      | -4.4     |
| 265 | -4.8  | -4.9      | -4.3      | -4.9     | -4.8     | -4.8      | -4.3     |
| 278 | -5.5  | -5.7      | -5.2      | -5.7     | -4.7     | -4.7      | -4.9     |
| 279 | -4.7  | -5.6      | -4.9      | -5.8     | -4.9     | -4.9      | -5.4     |
| 289 | -5.7  | -5.8      | -6.0      | -6.0     | -6.2     | -6.2      | -5.9     |
| 316 | -5.7  | -6.0      | -5.7      | -5.8     | -5.9     | -5.9      | -5.8     |
| 360 | -5.3  | -4.9      | -5.3      | -5.0     | -5.7     | -5.7      | -5.3     |
| 361 | -5.7  | -5.8      | -5.6      | -5.0     | -5.7     | -5.7      | -5.9     |
| 369 | -4.9  | -5.0      | -5.6      | -5.7     | -5.1     | -5.1      | -5.2     |
| 392 | -4.9  | -4.5      | -2.9      | -5.1     | -3.6     | -3.6      | -4.9     |
| 437 | -6.4  | -6.7      | -6.3      | -6.3     | -6.1     | -6.1      | -6.5     |
| 438 | -6.3  | -6.1      | -6.0      | -6.1     | -6.0     | -6.0      | -6.1     |
| 448 | -9.2  | -9.1      | -9.1      | -9.2     | -9.1     | -9.1      | -9.9     |
| 461 | -1.3  | -2.8      | 2.8       | -2.4     | -1.7     | -1.7      | -0.4     |
| 476 | -6.5  | -4.4      | -5.8      | -5.6     | -6.0     | -6.0      | -5.1     |
| 477 | -6.1  | -5.8      | -6.2      | -6.0     | -5.3     | -5.3      | -4.0     |
| 487 | -6.3  | -6.2      | -5.8      | -6.2     | -6.2     | -6.2      | -6.0     |
| 514 | -5.4  | -5.2      | -5.3      | -5.3     | -5.5     | -5.5      | -5.5     |
| 558 | -3.4  | -3.7      | -3.5      | -3.7     | -3.7     | -3.7      | -3.6     |
| 559 | -4.8  | -4.4      | -4.2      | -4.4     | -4.6     | -4.6      | -4.7     |
| 567 | -0.6  | -0.5      | -0.6      | -0.6     | -0.6     | -0.6      | -0.6     |

Table S111. Biological activities for BIN-T derivatives

|                                                             | BIN-T  | BIN-T-NH <sub>2</sub> | BIN-T-NHR | BIN-T-OH | BIN-T-OR | BIN-T-NO <sub>2</sub> | BIN-T-CN |
|-------------------------------------------------------------|--------|-----------------------|-----------|----------|----------|-----------------------|----------|
| Alpha-Radioprotector activity                               | 0.9622 | 0.9805                | 0.9569    | 0.9768   | 0.7982   | 0.2875                | 0.1747   |
| Gamma-radioprotector activity mechanism I                   | 0.0001 | 0.0021                | 0.7028    | 0.0063   | 0.5842   | 0.6667                | 0.4270   |
| Analgetic activity                                          | 0.9974 | 0.9970                | 0.9993    | 0.9962   | 0.9999   | 0.0000                | 0.8537   |
| Anti-Adenovirus activity                                    | 0.6113 | 0.0508                | 0.0805    | 0.3068   | 0.5616   | 0.0000                | 0.0000   |
| Anti-Arrhythmic activity                                    | 0.0000 | 0.0000                | 0.0000    | 0.0000   | 0.8874   | 0.1748                | 0.0051   |
| Anti-Bacterial activity                                     | 0.0000 | 0.0000                | 0.0000    | 0.0000   | 0.0000   | 0.0000                | 0.0000   |
| Anti-Oxidant activity                                       | 0.4819 | 0.4865                | 0.6316    | 0.4250   | 0.1175   | 0.8736                | 0.9080   |
| Anti-Psychotic activity diazepine site                      | 0.3933 | 0.6528                | 0.7869    | 0.5042   | 0.8201   | 0.9101                | 0.7382   |
| Anti-Tumor Alkyllic activity                                | 0.6099 | 0.6181                | 0.7130    | 0.5870   | 0.5749   | 0.0482                | 0.1398   |
| Anti-Tumor Antimitotic activity                             | 0.8712 | 0.8477                | 0.9057    | 0.8245   | 0.9410   | 0.5231                | 0.6042   |
| Anti-Tumor Cycline-dependent kinase 4 inhibitory activity   | 0.9586 | 0.9785                | 0.9887    | 0.9596   | 0.8466   | 0.1101                | 0.0331   |
| Anti-Tumor Dihydrofolate reductase inhibitory activity      | 0.1093 | 0.1486                | 0.0723    | 0.0901   | 0.0070   | 0.0157                | 0.0135   |
| Anti-Tumor DNA anti-metabolic activity                      | 0.5190 | 0.5402                | 0.5167    | 0.6178   | 0.0201   | 0.9847                | 0.9893   |
| Anti-Tumor Topoisomerase I inhibitory activity              | 0.0000 | 0.0000                | 0.0000    | 0.0000   | 0.0064   | 0.0000                | 0.0000   |
| Anti-Tumor Topoisomerase II inhibitory activity             | 0.9850 | 0.9900                | 0.9948    | 0.9835   | 0.9938   | 0.9144                | 0.9421   |
| HIV1-protease inhibitory activity                           | 0.3251 | 0.6082                | 0.3607    | 0.2577   | 0.8254   | 0.6909                | 0.7362   |
| HT51 A inhibitory activity                                  | 0.4192 | 0.4592                | 0.0730    | 0.3149   | 0.3235   | 0.6063                | 0.1419   |
| Tuberculostatic Dihydrofolate reductase inhibitory activity | 0.8241 | 0.9082                | 0.8880    | 0.6865   | 0.9611   | 0.5479                | 0.8201   |
| Human factor XA Inhibitory activity                         | 0.0827 | 0.0000                | 0.0000    | 0.7353   | 0.0000   | 0.8475                | 0.9976   |
| Metabolism at CYP450 2D6                                    | 0.8239 | 0.9234                | 0.4072    | 0.9172   | 0.7863   | 0.9525                | 0.9534   |
| Metabolism at CYP450 3A4                                    | 0.9796 | 0.9835                | 0.7947    | 0.9772   | 0.9884   | 0.9897                | 0.9971   |
| Progestagenic activity                                      | 0.9970 | 0.9990                | 0.9979    | 0.9976   | 0.9998   | 0.0000                | 0.0006   |
| Vasorelaxant_activity                                       | 0.0019 | 0.0000                | 0.0000    | 0.0062   | 0.0000   | 0.7761                | 0.6993   |
| COX1 inhibitory activity                                    | 0.9489 | 0.9253                | 0.9128    | 0.9624   | 0.7266   | 0.6541                | 0.8284   |
| COX2 inhibitory activity                                    | 0.0066 | 0.1151                | 0.5764    | 0.0376   | 0.0000   | 0.0000                | 0.0005   |
| LOX inhibitory activity                                     | 0.9674 | 0.9226                | 0.9638    | 0.9550   | 0.8777   | 0.0000                | 0.0000   |

Table SI12. Biological activities for BIN derivatives

|                                                             | BIN    | BIN-NH <sub>2</sub> | BIN-NHR | BIN-OH | BIN-OR | BIN-NO <sub>2</sub> | BIN-CN |
|-------------------------------------------------------------|--------|---------------------|---------|--------|--------|---------------------|--------|
| Alpha-Radioprotector activity                               | 0.8196 | 0.9570              | 0.8385  | 0.8902 | 0.9003 | 0.5686              | 0.8684 |
| Gamma-radioprotector activity mechanism I                   | 0.5000 | 0.6080              | 0.2073  | 0.0106 | 0.0439 | 0.0022              | 0.0100 |
| Analgetic activity                                          | 0.0991 | 0.2240              | 0.9666  | 0.0000 | 0.9531 | 0.0000              | 0.0001 |
| Anti-Adenovirus activity                                    | 0.0000 | 0.0009              | 0.7220  | 0.1322 | 0.9447 | 0.2521              | 0.2843 |
| Anti-Arrhythmic activity                                    | 0.2960 | 0.0022              | 0.9703  | 0.5925 | 0.7894 | 0.9482              | 0.7626 |
| Anti-Bacterial activity                                     | 0.1914 | 0.0656              | 0.5679  | 0.7965 | 0.1850 | 0.7994              | 0.8052 |
| Anti-Oxidant activity                                       | 0.0000 | 0.0000              | 0.2715  | 0.0000 | 0.3995 | 0.0407              | 0.0000 |
| Anti-Psychotic activity diazepam site                       | 0.4555 | 0.3506              | 0.8854  | 0.1307 | 0.2691 | 0.2770              | 0.1110 |
| Anti-Tumor Alkyllic activity                                | 0.4472 | 0.3561              | 0.5869  | 0.3447 | 0.5255 | 0.3652              | 0.3728 |
| Anti-Tumor Antimitotic activity                             | 0.1436 | 0.1110              | 0.0471  | 0.1279 | 0.0528 | 0.1618              | 0.1159 |
| Anti-Tumor Cycline-dependent kinase 4 inhibitory activity   | 0.7125 | 0.9176              | 0.0000  | 0.5818 | 0.0007 | 0.6316              | 0.4891 |
| Anti-Tumor Dihydrofolate reductase inhibitory activity      | 0.0511 | 0.1729              | 0.2079  | 0.0512 | 0.1723 | 0.0993              | 0.0693 |
| Anti-Tumor DNA anti-metabolitic activity                    | 0.9093 | 0.8256              | 0.3907  | 0.8666 | 0.2542 | 0.8949              | 0.9157 |
| Anti-Tumor Topoisomerase I inhibitory activity              | 0.9843 | 0.6425              | 0.0000  | 0.9991 | 0.0000 | 0.9974              | 0.9993 |
| Anti-Tumor Topoisomerase II inhibitory activity             | 0.3537 | 0.8739              | 0.8230  | 0.6246 | 0.7861 | 0.7291              | 0.6574 |
| HIV1-protease inhibitory activity                           | 0.2974 | 0.4583              | 0.5622  | 0.0902 | 0.2973 | 0.1340              | 0.0912 |
| HT51 A inhibitory activity                                  | 0.2189 | 0.3627              | 0.0000  | 0.0012 | 0.0000 | 0.0000              | 0.0000 |
| Tuberculostatic Dihydrofolate reductase inhibitory activity | 0.9912 | 0.9971              | 0.8944  | 0.5083 | 0.9785 | 0.7790              | 0.5400 |
| Human factor XA Inhibitory activity                         | 0.9926 | 0.9434              | 0.9703  | 0.9999 | 0.9997 | 0.5847              | 0.9930 |
| Metabolism at CYP450 2D6                                    | 0.8812 | 0.8614              | 0.5392  | 0.6337 | 0.9112 | 0.7537              | 0.6168 |
| Metabolism at CYP450 3A4                                    | 0.9979 | 0.9979              | 0.9988  | 0.8639 | 0.9996 | 0.9196              | 0.8760 |
| Progestagenic activity                                      | 0.9679 | 0.8797              | 0.3993  | 0.6726 | 0.0264 | 0.9879              | 0.9493 |
| Vasorelaxant activity                                       | 0.1269 | 0.0177              | 0.0037  | 0.2859 | 0.1383 | 0.2555              | 0.0940 |
| COX1 inhibitory activity                                    | 0.6328 | 0.0203              | 0.0000  | 0.0001 | 0.0000 | 0.0000              | 0.0000 |
| COX2 inhibitory activity                                    | 0.9999 | 0.7328              | 0.9995  | 1.0000 | 0.9978 | 0.9999              | 1.0000 |
| LOX inhibitory activity                                     | 0.0003 | 0.0062              | 0.0463  | 0.0000 | 0.0281 | 0.0000              | 0.0000 |
